# Supplementary material for: Post-hercynian ultra-high temperature tectono-metamorphic evolution of the Middle Atlas lower crust (Central Morocco) revealed by metapelitic granulites xenoliths
Source: Copernicus journal article supplement (doi:10.5194/egusphere-2024-508), 2024-04-03
Supplement: Supplementary file 2 [file egusphere-2024-508-supplement-version2.zip]

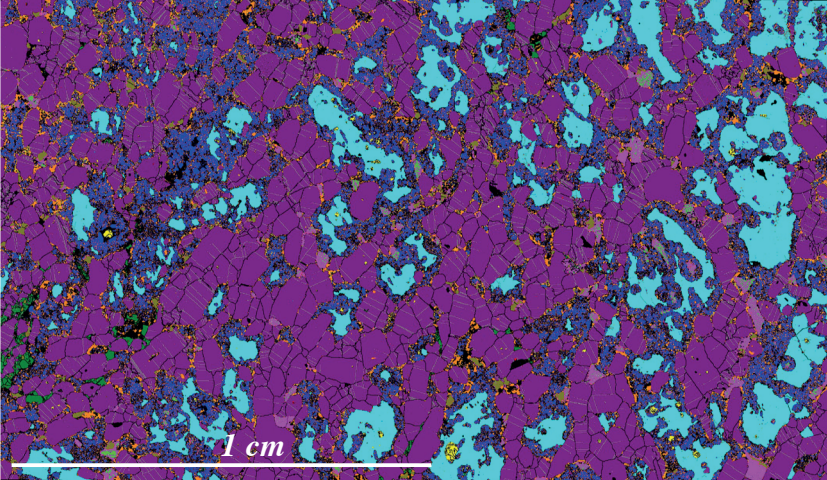

*1 cm*

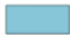

*Garnet*

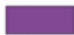

*Sillimanite*

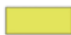

*Quartz*

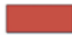

*K-feldspar*

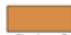

*Spinel*

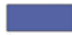

*Orthopyroxene*

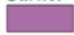

*Ilmenite*

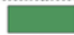

*Plagioclase*

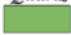

*Ti-Magnetite*

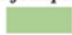

*Corindon*

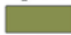

*Rutile*

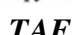

*TAF 501*
