# Supplementary material for: Post-hercynian ultra-high temperature tectono-metamorphic evolution of the Middle Atlas lower crust (Central Morocco) revealed by metapelitic granulites xenoliths
Source: Copernicus journal article supplement (doi:10.5194/egusphere-2024-508), 2024-04-03
Supplement: Supplementary file 8 [file Fig. S3.pdf › Supplemantary Figures/Fig. S3.pdf]

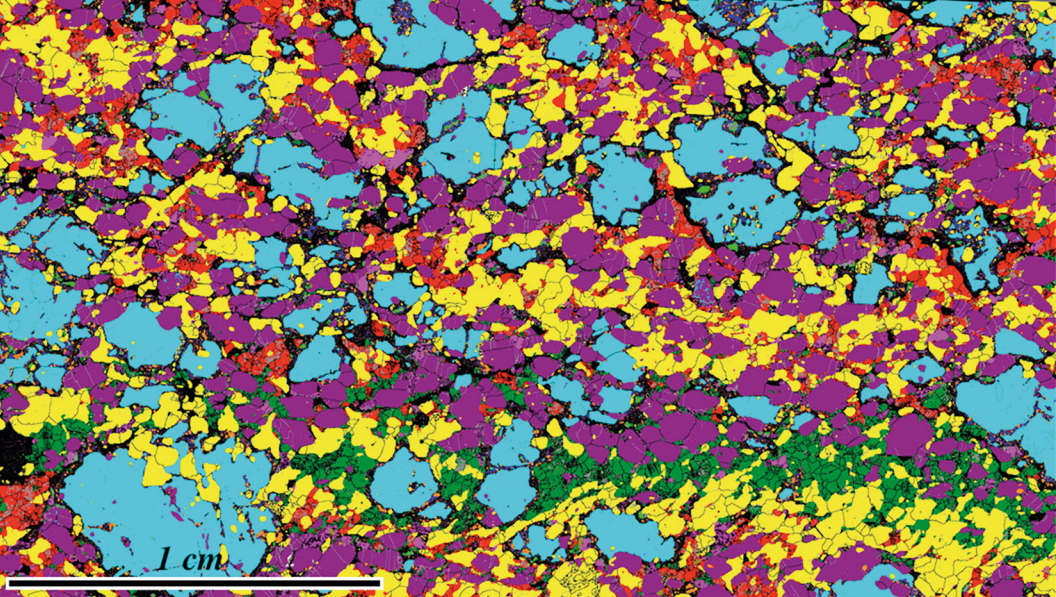

Garnet  
Ilmenite

Sillimanite  
Plagioclase

Quartz  
Ti-Magnetite

K-feldspar  
Corindon

Spinel  
Rutile

Orthopyroxene
