# Supplementary figures and images for: Post-hercynian ultra-high temperature tectono-metamorphic evolution of the Middle Atlas lower crust (Central Morocco) revealed by metapelitic granulites xenoliths
Source: Copernicus journal article supplement (doi:10.5194/egusphere-2024-508), 2024-04-03

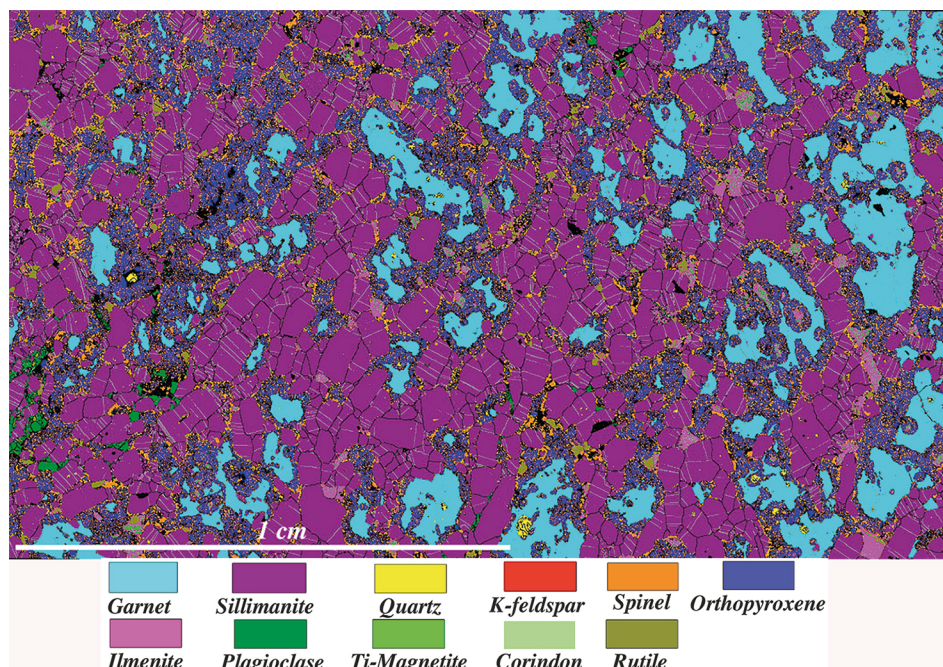

Supplement: Supplementary file 10 [file Fig. S5.pdf › Supplemantary Figures/Fig. S5.pdf]

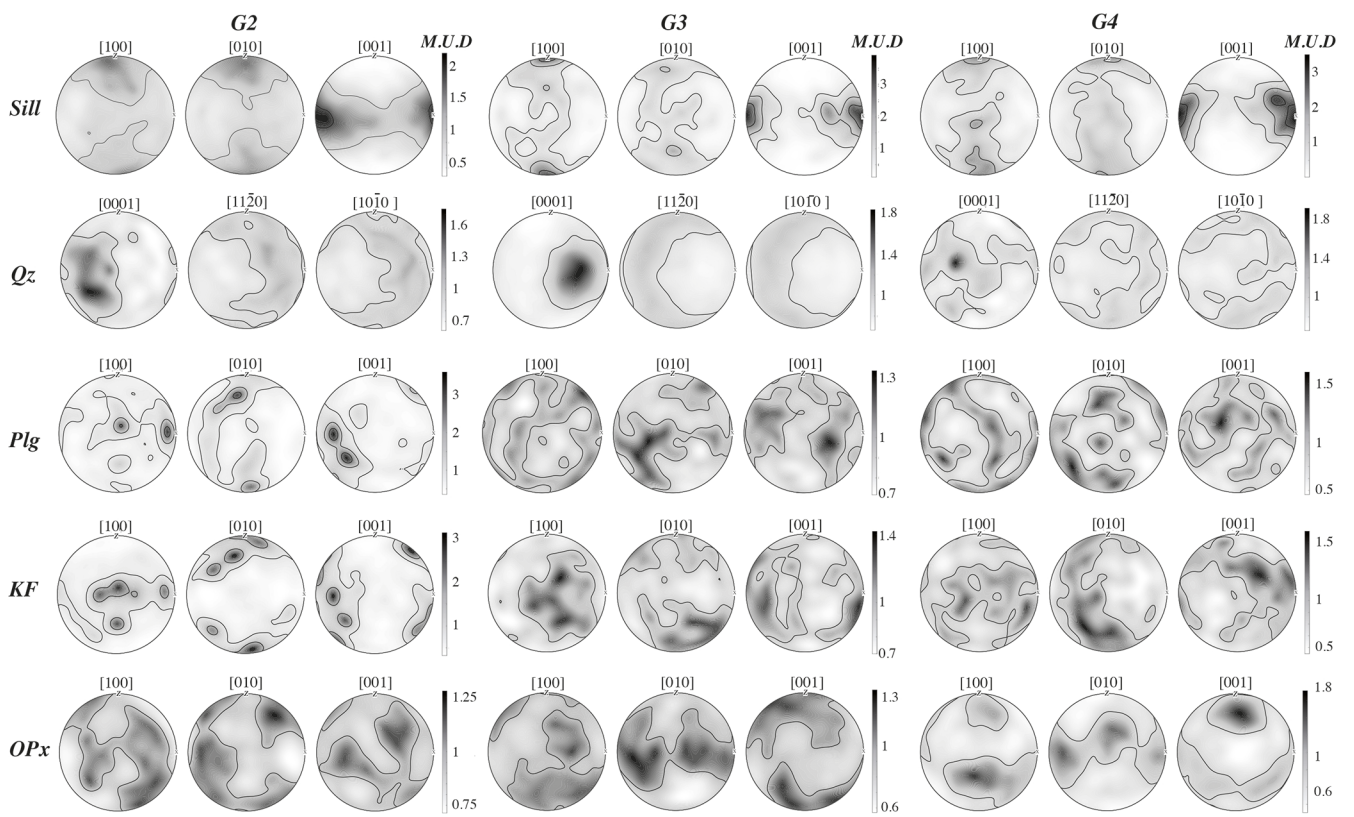

Supplement: Supplementary file 11 [file Fig. S7.pdf › Supplemantary Figures/Fig. S7.pdf]
